# Supplementary material for: Ultra-stretchable, self-recoverable, notch-insensitive, self-healable and adhesive hydrogel enabled by synergetic hydrogen and dipole–dipole crosslinking
Source: Royal Society of Chemistry journal article supplement (doi:10.1039/d4mh01462f), 2024-12-21
Supplement: d4mh01462f1.pdf [file d4mh01462f1.pdf]

Electronic Supplementary Information (ESI) for

**Ultra-stretchable, self-recovery, notch-insensitive, self-healable and adhesive hydrogel enabled by synergetic hydrogen and dipole-dipole crosslinking**

*Wanting Yuan<sup>a</sup>, Yi He<sup>a</sup>, Qianqian Liang<sup>a</sup>, Hongyi Lv<sup>a</sup>, Ziqi Wang<sup>a</sup>, Haitao Wu<sup>b</sup>, Jinrong Wu<sup>b</sup>, Lijuan Zhao<sup>a\*</sup>, Yi Wang<sup>a\*</sup>*

*<sup>a</sup> College of Chemistry and Materials Science, Sichuan Normal University, Chengdu 610068, China*

*<sup>b</sup> State Key Laboratory of Polymer Materials Engineering, College of Polymer Science and Engineering, Sichuan University, Chengdu 610065, China*

**Corresponding author contact:**

*Dr. Lijuan Zhao*

*College of Chemistry and Materials Science, Sichuan Normal University, Chengdu 610068, China*

*E-mail: [lijuan\\_zhao@sicnu.edu.cn](mailto:lijuan_zhao@sicnu.edu.cn)*

*Dr. Yi Wang*

*College of Chemistry and Materials Science, Sichuan Normal University, Chengdu 610068, China*

*E-mail: [wangyi2020@sicnu.edu.cn](mailto:wangyi2020@sicnu.edu.cn)*

This PDF file includes:

Supplementary Table

Supplementary Figure

## Supplementary Table

**Table S1** Composition of the AMA hydrogels.

| <b>Samples</b>                            | <b>AM<br/>(g)</b> | <b>MA<br/>(g)</b> | <b>AN<br/>(g)</b> |
|-------------------------------------------|-------------------|-------------------|-------------------|
| <b>A-M<sub>3.5</sub>-A<sub>0</sub></b>    | 30                | 3.5               | 0                 |
| <b>A-M<sub>3.5</sub>-A<sub>1.4</sub></b>  | 30                | 3.5               | 1.4               |
| <b>A-M<sub>3.5</sub>-A<sub>2.8</sub></b>  | 30                | 3.5               | 2.8               |
| <b>A-M<sub>3.5</sub>-A<sub>5.6</sub></b>  | 30                | 3.5               | 5.6               |
| <b>A-M<sub>3.5</sub>-A<sub>11.2</sub></b> | 30                | 3.5               | 11.2              |
| <b>A-M<sub>3.5</sub>-A<sub>16.8</sub></b> | 30                | 3.5               | 16.8              |
| <b>A-M<sub>0</sub>-A<sub>1.4</sub></b>    | 30                | 0                 | 1.4               |
| <b>A-M<sub>2</sub>-A<sub>1.4</sub></b>    | 30                | 2                 | 1.4               |
| <b>A-M<sub>3.5</sub>-A<sub>1.4</sub></b>  | 30                | 3.5               | 1.4               |
| <b>A-M<sub>5</sub>-A<sub>1.4</sub></b>    | 30                | 5                 | 1.4               |
| <b>A-M<sub>6.5</sub>-A<sub>1.4</sub></b>  | 30                | 6.5               | 1.4               |
| <b>A-M<sub>8</sub>-A<sub>1.4</sub></b>    | 30                | 8                 | 1.4               |

Supplementary Figure

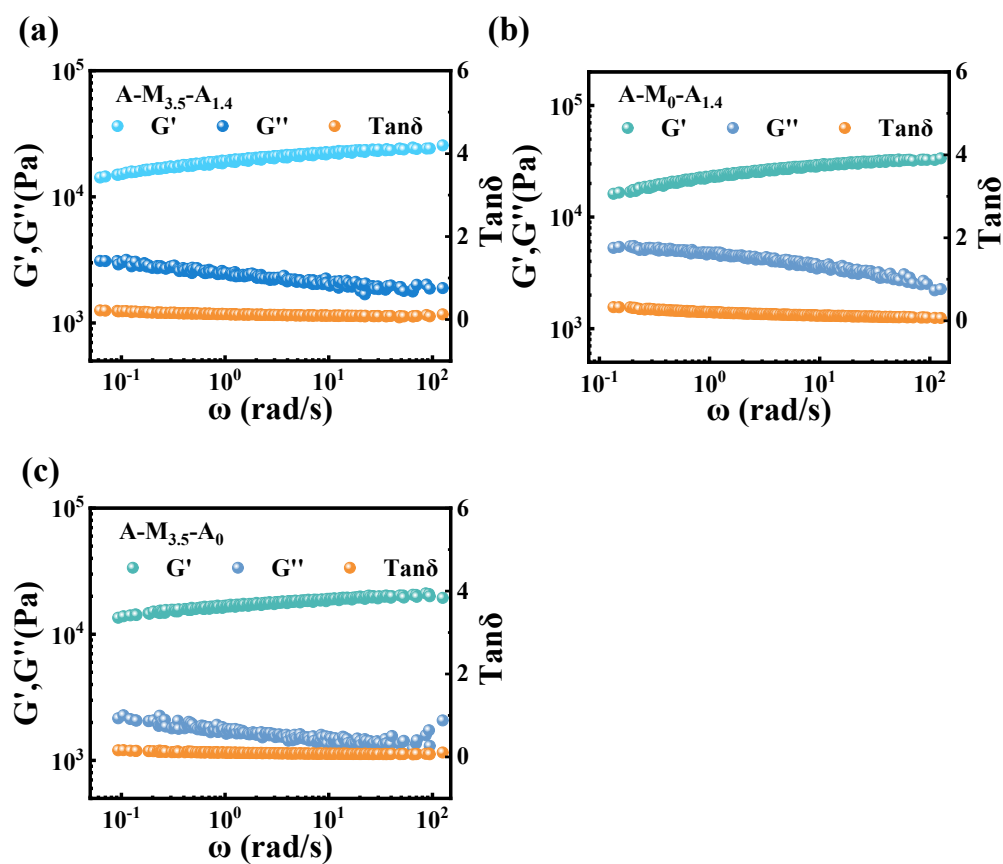

**Fig. S1** Master curves of frequency dependence of  $G$ ,  $G''$  and  $\tan\delta$  of the  $A-M_{3.5}-A_{1.4}$ ,  $A-M_0-A_{1.4}$  and  $A-M_{3.5}-A_0$  hydrogels.

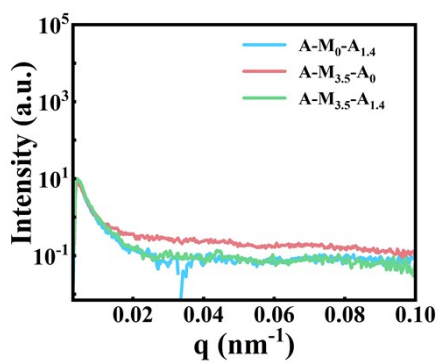

**Fig. S2** SAXS intensity distribution pattern of the  $A-M_{3.5}-A_{1.4}$ ,  $A-M_0-A_{1.4}$  and  $A-M_{3.5}-A_0$  hydrogels

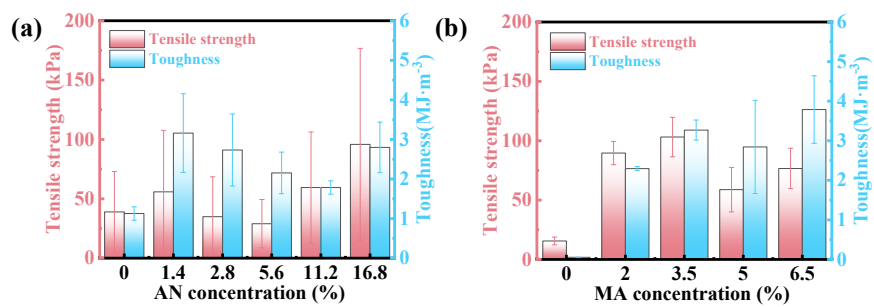

**Fig. S3** Tensile strength and toughness of the A-M<sub>3.5</sub>-A<sub>0</sub> and A-M<sub>0</sub>-A<sub>1.4</sub> hydrogels.

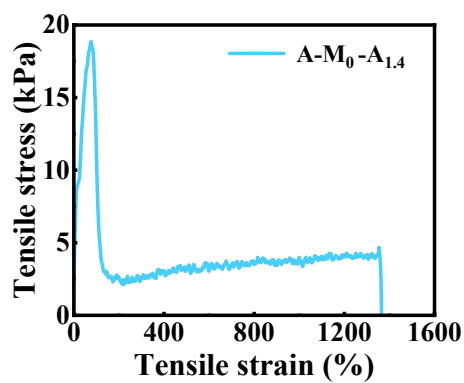

**Fig. S4** Tensile stress-strain curve of the A-M<sub>0</sub>-A<sub>1.4</sub> hydrogel.

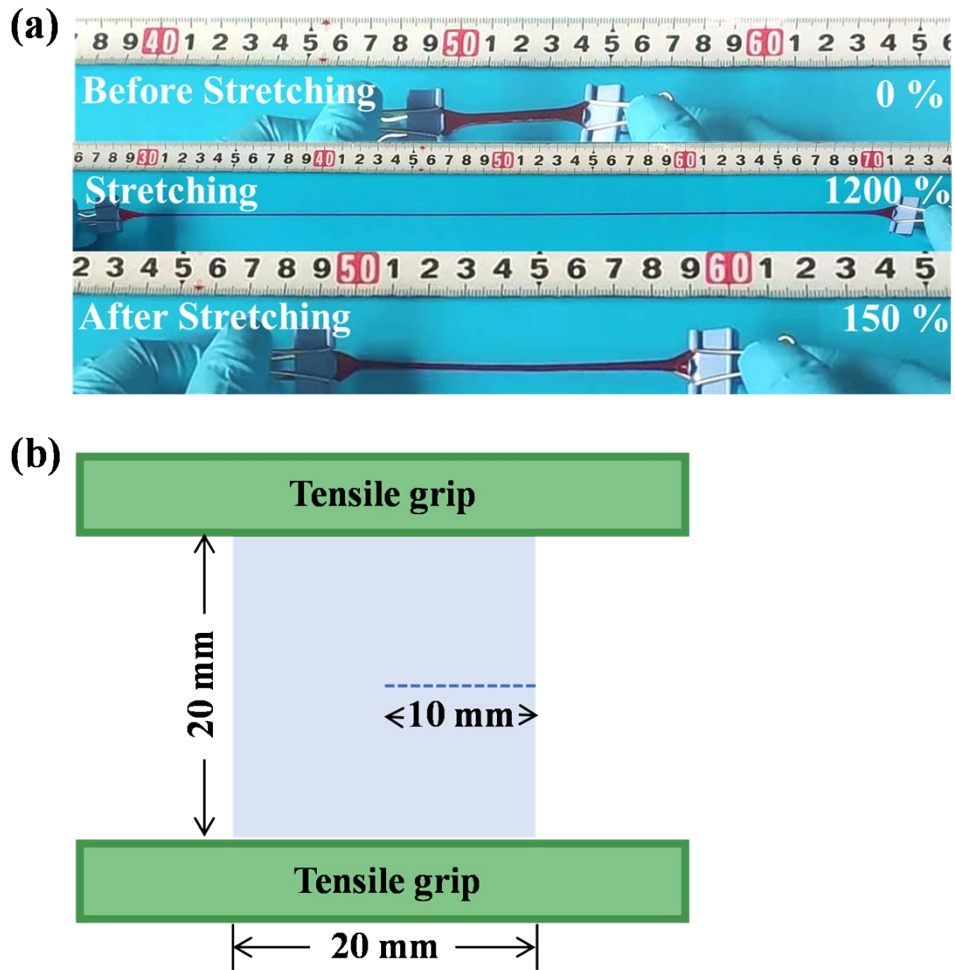

**Fig. S5** (a) Self-recovery performance of the A-M<sub>3.5</sub>-A<sub>1.4</sub> hydrogel stained with red ink after stretching to 1200% strain. (b) The geometry of the notched sample.
